# Supplementary material
Source: Springer Nature journal article supplement (https://www.springermedizin.de/resource/supplementary/12974_2011_438_MOESM15_ESM.pdf/9601288)

# Dorsal Root Ganglia

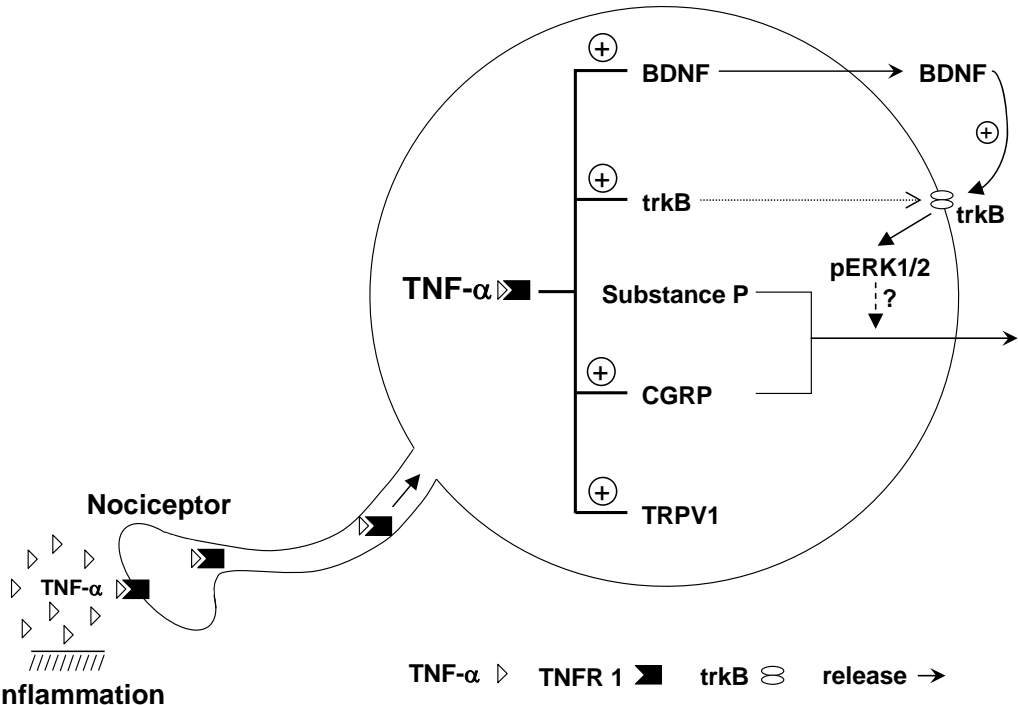

Supplement: MOESM15 [file 9601288]
